# Supplementary material
Source: PubMed Central journal article supplement (PMC4393529)

**Figure S1.**

**A**

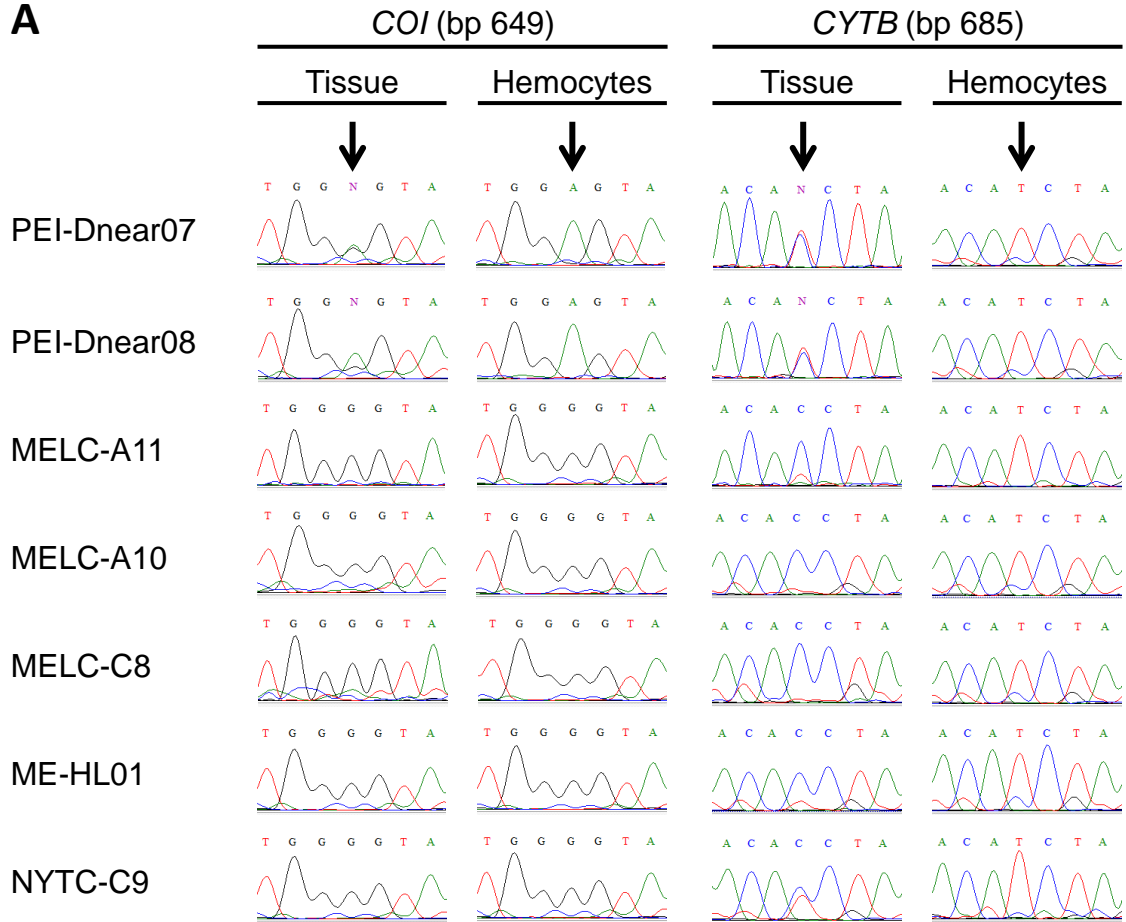

**B**

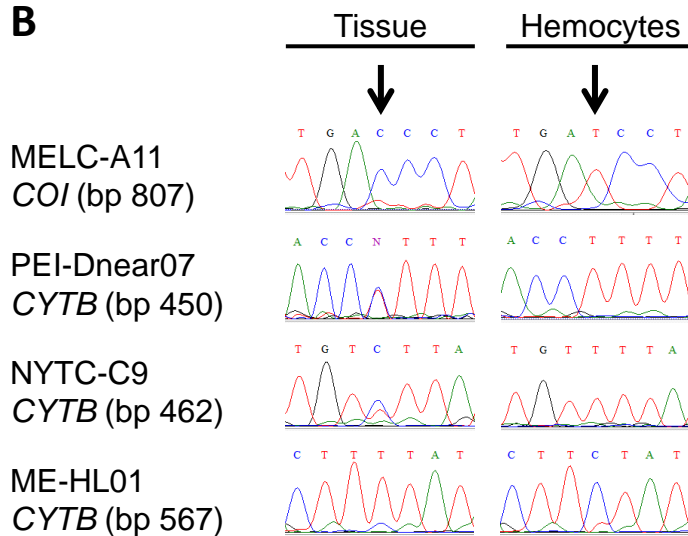

Supplement: NIHMS668941-supplement-2.pdf [file NIHMS668941-supplement-2.pdf]
